# Toward a Genome Scale Sequence Specific Dynamic Model of Cell-Free Protein Synthesis in *Escherichia coli*

Nicholas Horvath, Michael Vilkhovoy, Joseph A. Wayman<sup>a</sup>, Kara Calhoun<sup>b</sup>, James Swartz<sup>b</sup>, Jeffrey D. Varner

*Robert Frederick Smith School of Chemical and Biomolecular Engineering, Cornell University, Ithaca, NY 14853*

<sup>a</sup>*School of Applied and Engineering Physics, Cornell University, Ithaca, NY 14853*

<sup>b</sup>*School of Chemical Engineering, Stanford University, Stanford, CA 94395*

---

## Abstract

Cell-free protein expression systems have become widely used in systems and synthetic biology. In this study, we developed an ensemble of dynamic *E. coli* cell-free protein synthesis (CFPS) models. Model parameters were estimated from a training dataset for the cell-free production of a protein product, chloramphenicol acetyltransferase (CAT). The dataset consisted of measurements of glucose, organic acids, energy species, amino acids, and CAT. The ensemble accurately predicted these measurements, especially those of the central carbon metabolism. We then used the trained model to evaluate the optimality of protein production. CAT was produced with an energy efficiency of 12%, suggesting that the process could be further optimized. Reaction group knockouts showed that protein productivity and the metabolism as a whole depend most on oxidative phosphorylation and glycolysis and gluconeogenesis. Amino acid biosynthesis is also important for productivity, while the overflow metabolism and TCA cycle affect the overall system state. In addition, the translation rate is shown to be more important to productivity than the transcription rate. Finally, CAT production was robust to allosteric control, as was most of the network, with the exception of the organic acids in central carbon metabolism. This study is the first to use kinetic modeling to predict dynamic protein production in a cell-free *E. coli* system, and should provide a foundation for genome scale, dynamic modeling of cell-free *E. coli* protein synthesis.

*Keywords:* Biochemical engineering, cell-free protein synthesis, kinetic modeling

---

## 1 Introduction

2 Cell-free protein expression has become a widely used research tool in  
3 systems and synthetic biology, and a promising technology for personalized  
4 point of use biotechnology [1]. Cell-free systems offer many advantages for  
5 the study, manipulation and modeling of metabolism compared to *in vivo*  
6 processes. Central amongst these, is direct access to metabolites and the  
7 biosynthetic machinery without the interference of a cell wall, or complica-  
8 tions associated with cell growth. This allows us to interrogate (and po-  
9 tentially manipulate) the chemical microenvironment while the biosynthetic  
10 machinery is operating, potentially at a fine time resolution. Cell-free pro-  
11 tein synthesis (CFPS) systems are arguably the most prominent examples  
12 of cell-free systems used today [2]. However, CFPS is not new; CFPS in  
13 crude *E. coli* extracts has been used since the 1960s to explore fundamental  
14 biological mechanisms. For example, Matthaei and Nirenberg used *E. coli*  
15 cell-free extract in ground-breaking experiments to decipher the sequencing  
16 of the genetic code [3, 4]. Spirin and coworkers later improved protein pro-  
17 duction in cell free extracts by continuously exchanging reactants and prod-  
18 ucts; however, while these extracts could run for tens of hours, they could  
19 only synthesize a single product and were energy limited [5]. More recently,  
20 energy and cofactor regeneration in CFPS has been significantly improved;  
21 for example ATP can be regenerated using substrate level phosphorylation  
22 [6] or even oxidative phosphorylation [2]. Today, cell-free systems are used  
23 in a variety of applications ranging from therapeutic protein production [7]  
24 to synthetic biology [8, 1]. Moreover, there are also several CFPS technol-  
25 ogy platforms, such as the PANOX-SP and Cytomin platforms developed by  
26 Swartz and coworkers [9, 2], and the TX/TL platform of Noireaux [10]. How-  
27 ever, if CFPS is to become a mainstream technology for applications such as  
28 point of care biomanufacturing, we must first understand the performance  
29 limits of these systems, and eventually optimize their yield and productivity.  
30 A critical tool towards this goal is the development of a CFPS mathematical  
31 model.

32 Mathematical modeling has long contributed to our understanding of  
33 metabolism [11]. Decades before the genomics revolution, mechanistically

34 structured metabolic models arose from the desire to predict microbial phe-  
35 notypes resulting from changes in intracellular or extracellular states [12].  
36 The single cell *E. coli* models of Shuler and coworkers pioneered the con-  
37 struction of large-scale, dynamic metabolic models that incorporated multi-  
38 ple regulated catabolic and anabolic pathways constrained by experimentally  
39 determined kinetic parameters [13]. Shuler and coworkers generated many  
40 single cell kinetic models, including single cell models of eukaryotes [14, 15],  
41 minimal cell architectures [16], and DNA sequence based whole-cell models  
42 of *E. coli* [17]. More recent studies have extended the approach to integrate  
43 disparate models of cellular processes in *M. genitalium* [18], describe dozens  
44 of mutant strains in *E. coli* with a single kinetic model [19], and identify  
45 industrially useful target enzymes in *E. coli* to improve 1,4-butanediol pro-  
46 duction [20]. However, cell-free genome scale kinetic models of industrially  
47 important organisms such as *E. coli* have yet to be constructed.

48 In this study, we developed an ensemble of kinetic cell-free protein syn-  
49 thesis (CFPS) models using dynamic metabolite measurements from an early  
50 glucose powered Cytomin *E. coli* cell-free extract. While cell-free technology  
51 has evolved considerably since these measurements were taken, developing  
52 a model using a previous generation CFPS platform offers several unique  
53 advantages. First and foremost, is the ability to directly compare the dif-  
54 ferent improvements established by purely experimental means, to those es-  
55 timated from a mathematical model. The CFPS model equations were for-  
56 mulated using the hybrid cell-free modeling framework of Wayman et al.  
57 [21], which integrates traditional kinetic modeling with a logical rule-based  
58 description of allosteric regulation. Model parameters were estimated from  
59 measurements of glucose, organic acids, energy species, amino acids, and the  
60 protein product, chloramphenicol acetyltransferase (CAT) over the course  
61 of a three hour protein synthesis reaction. A constrained Markov Chain  
62 Monte Carlo (MCMC) approach was used to minimize the squared differ-  
63 ence between model simulations and experimental measurements, where a  
64 plausible range for each kinetic parameter was established from BioNumbers  
65 [22]. The ensemble of parameter sets described the training data with a me-  
66 dian cost greater than two orders of magnitude smaller than a population  
67 of random parameter sets constructed using the same literature parameter  
68 constraints. We then used the ensemble of kinetic models to analyze the  
69 performance of the CFPS system, and to estimate the pathways most im-  
70 portant to protein production. We calculated that CAT was produced with  
71 an energy efficiency of 12%, suggesting that much of the energy resources for

72 protein synthesis were diverted to non-productive pathways. By knocking  
73 out metabolic enzymes in groups, we showed that metabolism and protein  
74 production in particular depended upon oxidative phosphorylation and gly-  
75 colysis /gluconeogenesis. Taken together, this study provides a foundation  
76 for sequence specific genome scale, dynamic modeling of cell-free *E. coli* pro-  
77 tein synthesis.

## 78 Results

79 The cell-free *E. coli* metabolic network was constructed by removing  
80 growth associated reactions from the *iAF1260* reconstruction of K-12 MG1655  
81 *E. coli* [23], and by adding reactions describing chloramphenicol acetyltrans-  
82 ferase (CAT) biosynthesis (Fig. 1). In addition, reactions that were knocked  
83 out in the host strain used to prepare the extract were removed from the net-  
84 work ( $\Delta$ speA,  $\Delta$ tnaA,  $\Delta$ sdaA,  $\Delta$ sdaB,  $\Delta$ gshA,  $\Delta$ tonA,  $\Delta$ endA). Lastly, we  
85 added the transcription and translation template reactions of Allen and Pals-  
86 son for the specific proteins of interest [24]. The metabolic network, which  
87 contained XX metabolites and YY reactions, is available in the supplemental  
88 materials. The dynamic CFPS model equations were formulated using the  
89 hybrid cell-free modeling framework of Wayman et al. [21]. An ensemble  
90 of model parameter sets ( $N = 3,000$ ) was estimated from measurements of  
91 glucose, CAT, organic acids (pyruvate, lactate, acetate, succinate, malate),  
92 energy species (A(x)P, G(x)P, C(x)P, U(x)P), and 18 of the 20 proteinogenic  
93 amino acids [25] using a constrained Markov Chain Monte Carlo (MCMC)  
94 approach.

95 The MCMC algorithm minimized the squared difference (residual) be-  
96 tween the training data and model simulations starting from an initial pa-  
97 rameter set assembled from literature and inspection. Bounds on permis-  
98 sible parameter values were established using studies from the BioNumbers  
99 database [22]. For each newly generated parameter set, we re-solved the bal-  
100 ance equations and calculated the cost function; all sets with a lower cost  
101 (and some with higher cost) were accepted into the ensemble. Parameter  
102 sets were also required to meet strict ordinary differential equation solver  
103 tolerances, to ensure numerical stability. Approximately  $N = 3,000$  sets were  
104 accepted into an initial ensemble;  $N = 100$  sets were then selected based  
105 upon error for the final ensemble. The final ensemble had a mean Pearson  
106 correlation coefficient of 0.78; this suggested parameter sets were not over  
107 sampled in the region of a local minimum. The median maximum reaction  
108 rate ( $V_{max}$ ) across the ensemble was 11.6 mM/h, assuming a total cell-free  
109 enzyme concentration of 170 nM. This  $V_{max}$  corresponded to a median cat-  
110 alytic rate of  $19 \text{ s}^{-1}$  across the ensemble; this was in agreement with the  $13.7$   
111  $\text{s}^{-1}$  median catalytic rate found by Bar-Even and coworkers [26]. The median  
112 enzyme activity decay constant was  $0.0045 \text{ h}^{-1}$ , corresponding to an enzyme  
113 activity half life of 6 days. The median saturation constant was 1.0 mM; this  
114 is within one order of magnitude of the 130  $\mu\text{M}$  reported by Bar-Even and

115 coworkers. Lastly, both the median control gain parameter, and the control  
116 order parameter in the ensemble were order 1. While the maximum reac-  
117 tion rates of the ensemble were distributed evenly across the allowed range  
118 (Fig. S1A), the saturation constants were clustered around the upper and  
119 lower bounds (Fig. S1B).

120 The ensemble of kinetic CFPS models captured the time evolution of  
121 protein biosynthesis, and the consumption and production of organic acid,  
122 amino acid and energy species. Central carbon metabolites (Fig. 2, top),  
123 energy species (Fig. 4), and amino acids (Fig. 3) were captured by the en-  
124 semble and the best-fit set. The constrained MCMC approach estimated  
125 parameter sets with a median error more than two orders of magnitude less  
126 than random parameter sets generated within the same parameter bounds  
127 established from literature (Fig. 5); thus, we have confidence in the predic-  
128 tive capability of the estimated parameters. For 29 of the 37 measurements  
129 in the training dataset, the mean Akaike information criterion (AIC) of the  
130 ensemble was lower than that of the random sets, signifying a better fit of the  
131 data (Table 3). For the other 8 measurements, the random AIC was lower  
132 than the ensemble by an amount less than the standard deviation of either  
133 the random AIC or ensemble AIC (with the exception of isoleucine, which  
134 was quite close:  $\sigma_{\text{AIC}}^{\text{Rand}} = 4.8$ ,  $\mu_{\text{AIC}}^{\text{Rand}} - \mu_{\text{AIC}}^{\text{Ens}} = -5.0$ ). Taken together, these  
135 results suggested that the parameter ensemble modeled cell free metabolism  
136 and protein production, significantly better than if sampled randomly, not  
137 just overall but for the majority of individual measurements.

138 The model captured the biphasic time course of CAT production. During  
139 the first hour glucose powered protein production, and CAT was produced  
140 at 8  $\mu\text{M}/\text{h}$ ; subsequently, pyruvate and lactate reserves were consumed to  
141 power metabolism, and CAT was produced less quickly at 5  $\mu\text{M}/\text{h}$ . Allosteric  
142 control was important to central carbon metabolism, especially pyruvate, ac-  
143 etate, and succinate (Fig. 2, bottom). The difference between the allosteric  
144 control and no-control cases was mostly seen in the second phase of CAT pro-  
145 duction, following glucose exhaustion. Specifically, pyruvate, succinate, and  
146 malate consumption and acetate accumulation increased following glucose  
147 exhaustion without the allosteric control mechanisms. The rate of acetate  
148 accumulation increased by 172%, while the rates of malate, pyruvate, and  
149 lactate consumption increased by 146%, 82%, and 9%, respectively. Succin-  
150 ate went from accumulating slightly in the second phase, in the presence of  
151 allosteric control, to being fully consumed. However, CAT production was  
152 robust to the removal of allosteric control, as seen in both the fits against

153 data and the metabolic fluxes (see supplementary information). While ATP  
154 generation varied when allosteric control was removed, ATP expenditure to-  
155 ward CAT production did not. Most of the fluxes that differed between the  
156 two cases involved PEP and pyruvate, which directly participated in many of  
157 the reactions modulated by allosteric control. Taken together, the ensemble  
158 of kinetic models was consistent with time series measurements of the cell  
159 free production of a model protein. Although the ensemble described the  
160 experimental data, it was unclear which kinetic parameters and pathways  
161 most influenced CAT production. To explore this question, we performed  
162 reaction group knockout analysis.

163 The importance of CFPS pathways was estimated using pathway group  
164 knockout analysis (Fig. 7). The metabolic network was divided into 19 re-  
165 action groups, spanning central carbon metabolism, energetics, and amino  
166 acid biosynthesis. The response in the productivity or overall system state  
167 was calculated for single or pairwise deletion of each of these reaction groups.  
168 Lastly, the overall effect of the deletion of a pathway was estimated by sum-  
169 ming the single and pairwise effects (summation across the columns of the  
170 response array). Glycolysis/gluconeogenesis and oxidative phosphorylation  
171 had the greatest effect on both productivity and system state. This supports  
172 previous studies that have suggested oxidative phosphorylation is occurring  
173 in a cell-free system [2]; Jewett and coworkers observed a decrease in CAT  
174 yield, ranging from 1.5-fold to 4-fold, when inhibiting oxidative phosphory-  
175 lation reactions in the Cytomim cell-free platform, using both pyruvate and  
176 glutamate as substrates. CAT productivity was also affected by two sectors  
177 of amino acid biosynthesis: alanine/aspartate/asparagine, and glutamate/  
178 glutamine biosynthesis. This was consistent with aspartate, glutamate, and  
179 glutamine being key reactants in the biosynthesis of many other amino acids,  
180 all of which are required for CAT synthesis. Meanwhile, the TCA cycle and  
181 overflow metabolism (which included acetyl-coA/acetate reactions and the  
182 interconversion of pyruvate and lactate) also had a significant effect on the  
183 system state. These reactions directly impacted key system species: succi-  
184 nate and malate in the TCA cycle, and acetate, pyruvate, and lactate in  
185 the overflow metabolism. In addition, the relative influence of transcription  
186 and translation were interrogated via Sobol sampling [27]. Productivity was  
187 seen to have a sensitivity of  $0.43 \pm 0.06$  with respect to the maximum re-  
188 action rate of transcription, and  $0.66 \pm 0.08$  for the maximum reaction rate  
189 of translation. Thus, translation was the limiting step of cell free protein  
190 synthesis.

191 The energy efficiency of CAT production, as well as the sources of en-  
192 ergy generation and consumption, were tracked for the best-fit set. Energy  
193 efficiency was calculated as the ratio of transcription and translation rates  
194 (weighted by the associated ATP costs of each step) to the amount of ATP  
195 generated by all sources. During the first phase of protein production, with  
196 glucose as the substrate, CAT was produced with a productivity of  $8 \mu\text{M}/\text{h}$   
197 and an energy efficiency of 10%. Oxidative phosphorylation accounted for  
198 greater than 50% of the ATP generated during the rapid phase of protein  
199 production (Table 1). The organic acids that accumulated in the first phase  
200 (with the exception of acetate) were then utilized as substrates in the second  
201 phase, once glucose was depleted. We assumed the second phase of CAT pro-  
202 duction was powered largely by pyruvate; although malate was consumed in  
203 the second phase, it only accounted for 11% of substrate consumption. Fur-  
204 thermore, lactate is connected in the stoichiometry only to pyruvate. Thus,  
205 it is reasonable to consider the second phase as pyruvate-driven production.  
206 Interestingly, while this mode of protein production was slower ( $5 \mu\text{M}/\text{h}$ ),  
207 it exhibited a higher energy efficiency (14%). Of the ATP generated, about  
208 half was observed to come from oxidative phosphorylation in each of the two  
209 phases of production (Table 1, R\_atp). Another 30% was generated by glycol-  
210 ysis during the first phase (R\_pgk,R\_pyk), which decreased to approximately  
211 20% following glucose exhaustion. However, glycolysis was also amongst the  
212 largest consumers of ATP during first phase of production (R\_glk\_atp, R\_pfk)  
213 (Table 2). The TCA cycle (R\_sucCD) contributed 3% of to the overall ATP  
214 generation in the first phase and 5% in the second. The hypothesis that  
215 pyruvate drives the second phase explains this; stores of accumulated pyru-  
216 vate can be converted to acetyl-CoA, as well as OAA (via PEP), and thus  
217 power the TCA cycle just as when glucose was available. Interestingly, ATP  
218 generation through acetate metabolism (R\_ackA) increased from 12% in the  
219 first phase to 28% in the second. Amino acid degradation also contributes a  
220 negligible amount to energy production. While the efficiency of production  
221 was higher for the pyruvate-driven phase, it was still relatively low, sug-  
222 gesting that there is room for platform optimization. Taken together, this  
223 strengthens the importance of glycolysis and oxidative phosphorylation, and  
224 presents a trade-off between productivity and energy efficiency in CFPS.



## 225 Discussion

226 In this study, we developed an ensemble of kinetic cell-free protein syn-  
227 thesis (CFPS) models using dynamic metabolite measurements from an early  
228 glucose powered Cytomin *E. coli* cell-free extract. We used the hybrid cell-  
229 free modeling approach of Wayman and coworkers, which integrates tradi-  
230 tional kinetic modeling with a logic-based description of allosteric regula-  
231 tion, to describe the time evolution of the CFPS reaction. The ensemble  
232 captured dynamic metabolite measurements over 2-orders of magnitude bet-  
233 ter than random parameter sets generated in the same region of parameter  
234 space. The ensemble captured the biphasic time course of CAT production,  
235 relying on glucose during the first hour and pyruvate and lactate following  
236 glucose exhaustion. Allosteric control was essential to the description of the  
237 organic acid trajectories; without allosteric control, pyruvate, lactate, suc-  
238 cinate, and malate were predicted to be consumed more quickly following  
239 glucose exhaustion, to power CAT synthesis. Interestingly, CAT production  
240 was robust to the removal of allosteric control; because the amino acids and  
241 energy species that are reactants for CAT synthesis were also not affected  
242 by allosteric control. We then used the ensemble of kinetic models to an-  
243 alyze the performance of the CFPS system, and to estimate the pathways  
244 most important to protein production. We calculated that CAT was pro-  
245 duced with an energy efficiency of 12%, suggesting that much of the energy  
246 resources for protein synthesis were diverted to non-productive pathways.  
247 By knocking out metabolic enzymes in groups, we showed that metabolism  
248 and protein production in particular depended upon oxidative phosphory-  
249 lation and glycolysis /gluconeogenesis. Using the Sobol sampling technique  
250 we demonstrated the greater importance of translation rate than transcrip-  
251 tion. Taken together, this study provides a foundation for sequence specific  
252 genome scale, dynamic modeling of cell-free *E. coli* protein synthesis.

253 The ensemble of models quantitatively described the dynamic time evo-  
254 lution of the cell-free protein production. Thus, the model could serve as  
255 a surrogate to rationally design cell-free production processes to optimize  
256 production rate and yield. In analyzing the effect of reaction groups on  
257 CAT production and the system state, the regions of metabolism associated  
258 with substrate utilization and energy generation were the most important.  
259 Oxidative phosphorylation was vital, since it provides most of the energetic  
260 needs of CFPS. While it is unknown how active oxidative phosphorylation  
261 is compared to that of *in vivo* systems, our modeling approach suggested it

262 was critical to CFPS performance. However, the biphasic operation of CFPS  
263 highlights the ability of the system to respond to an absence of glucose. Dur-  
264 ing the first phase, there is an accumulation of central carbon metabolites  
265 with the majority of flux going toward acetate and some toward pyruvate,  
266 lactate, succinate and malate. While acetate continued to accumulate as a  
267 byproduct, the other organic acids were consumed as secondary substrates  
268 after glucose was no longer available. Glutamate also served as a substrate  
269 throughout both phases, powering amino acid synthesis. These results con-  
270 firm experimental findings that CAT production can be sustained by other  
271 substrates in the absence of glucose, providing alternative strategies to op-  
272 timize CFPS performance. While CAT synthesis can be powered by other  
273 substrates, the productivity is significantly lower ( $5 \mu\text{M}/\text{h}$ , as opposed to  
274  $8 \mu\text{M}/\text{h}$ ). This is in accordance with literature, where pyruvate provided a  
275 relatively slow but continuous supply of ATP [28]. However, the energy effi-  
276 ciency is slightly higher (14% as compared with 10%). Taken together, this  
277 shows CFPS can be designed towards a specified application, either requiring  
278 a slow stable energy source or faster production.

279 This work represents the first dynamic model of *E. coli* cell-free protein  
280 synthesis. We apply a hybrid modeling framework to capture an experimen-  
281 tal dataset for production of a test protein, and identify system limitations  
282 and areas of improvement for production efficiency. This work could be ex-  
283 tended through further experimentation to gain a deeper understanding of  
284 model performance under a variety of conditions. Specifically, CAT pro-  
285 duction performed in the absence of amino acids could inform the system's  
286 ability to manufacture them, while experimentation in the absence of glu-  
287 cose or oxygen could shed light on the importance of those substrates. In  
288 addition, the approach should be extended to other protein products. CAT  
289 is only a test protein used for model identification; the modeling framework,  
290 and to some extent the parameter values, should be protein agnostic. An im-  
291 portant extension of this study would be to apply its insights to other protein  
292 applications, where possible. Having captured the experimental data, we in-  
293 vestigated if CFPS performance could be further improved. We showed that  
294 the model predicts CAT production with an energy efficiency of 10% under  
295 glucose and 14% under pyruvate. The accumulation of glycolytic intermedi-  
296 ates and byproducts such as acetate and carbon dioxide were responsible for  
297 this sub-optimal performance. If fluxes could be balanced such that inter-  
298 mediates were fully utilized, CAT production would increase. Knocking out  
299 sections of network metabolism revealed that glycolysis/gluconeogenesis and

300 oxidative phosphorylation were the most important to CAT production and  
301 the system as a whole. Productivity was also heavily dependent on the syn-  
302 thesis reactions of alanine, aspartate, asparagine, glutamate, and glutamine,  
303 while TCA cycle and overflow reactions affected the system state. Taken  
304 together, these findings represent the first dynamic model of *E. coli* cell-  
305 free protein synthesis, an important step toward a functional genome scale  
306 description of cell free systems.

## 307 Materials and Methods

308 *Formulation and solution of the model equations.*

309 We used ordinary differential equations (ODEs) to model the time evo-  
 310 lution of metabolite ( $x_i$ ), scaled enzyme activity ( $\epsilon_i$ ), transcription ( $m$ ) and  
 311 translation ( $\mathcal{P}$ ) in an *E. coli* cell free metabolic network:

$$\frac{dx_i}{dt} = \sum_{j=1}^{\mathcal{R}} \sigma_{ij} r_j(\mathbf{x}, \epsilon, \mathbf{k}) \quad i = 1, 2, \dots, \mathcal{M} \quad (1)$$

$$\frac{d\epsilon_i}{dt} = -\lambda_i \epsilon_i \quad i = 1, 2, \dots, \mathcal{E} \quad (2)$$

$$\frac{dm}{dt} = \bar{r}_T u - \bar{r}_d \quad (3)$$

$$\frac{d\mathcal{P}}{dt} = \bar{r}_X \quad (4)$$

312 The quantity  $\mathcal{R}$  denotes the number of metabolic reactions,  $\mathcal{M}$  denotes the  
 313 number of metabolites and  $\mathcal{E}$  denotes the number of metabolic enzymes in  
 314 the model. The quantity  $r_j(\mathbf{x}, \epsilon, \mathbf{k})$  denotes the rate of reaction  $j$ . Typically,  
 315 reaction  $j$  is a non-linear function of metabolite and enzyme abundance, as  
 316 well as unknown kinetic parameters  $\mathbf{k}$  ( $\mathcal{K} \times 1$ ). The quantity  $\sigma_{ij}$  denotes the  
 317 stoichiometric coefficient for species  $i$  in reaction  $j$ . If  $\sigma_{ij} > 0$ , metabolite  $i$   
 318 is produced by reaction  $j$ . Conversely, if  $\sigma_{ij} < 0$ , metabolite  $i$  is consumed  
 319 by reaction  $j$ , while  $\sigma_{ij} = 0$  indicates metabolite  $i$  is not connected with  
 320 reaction  $j$ . Lastly,  $\lambda_i$  denotes the scaled enzyme activity decay constant. The  
 321 system material balances were subject to the initial conditions  $\mathbf{x}(t_o) = \mathbf{x}_o$   
 322 and  $\epsilon(t_o) = \mathbf{1}$  (initially we have 100% cell-free enzyme activity).

323 Metabolic reaction rates were written as the product of a kinetic term  
 324 ( $\bar{r}_j$ ) and a control term ( $v_j$ ),  $r_j(\mathbf{x}, \mathbf{k}) = \bar{r}_j v_j$ . We used multiple saturation  
 325 kinetics to model the reaction term  $\bar{r}_j$ :

$$\bar{r}_j = V_j^{max} \epsilon_i \prod_{s \in m_j^-} \frac{x_s}{K_{js} + x_s} \quad (5)$$

326 where  $V_j^{max}$  denotes the maximum rate for reaction  $j$ ,  $\epsilon_i$  denotes the scaled  
 327 enzyme activity which catalyzes reaction  $j$ ,  $K_{js}$  denotes the saturation con-  
 328 stant for species  $s$ , in reaction  $j$  and  $m_j^-$  denotes the set of *reactants* for  
 329 reaction  $j$ .

330 The control term  $0 \leq v_j \leq 1$  depended upon the combination of factors  
 331 which influenced rate process  $j$ . For each rate, we used a rule-based approach  
 332 to select from competing control factors. If rate  $j$  was influenced by  $1, \dots, m$   
 333 factors, we modeled this relationship as  $v_j = \mathcal{I}_j(f_{1j}(\cdot), \dots, f_{mj}(\cdot))$  where  
 334  $0 \leq f_{ij}(\cdot) \leq 1$  denotes a transfer function quantifying the influence of factor  
 335  $i$  on rate  $j$ . The function  $\mathcal{I}_j(\cdot)$  is an integration rule which maps the output  
 336 of regulatory transfer functions into a control variable. We used hill-like  
 337 transfer functions and  $\mathcal{I}_j \in \{min, max\}$  in this study [21]. We included  
 338 17 allosteric regulation terms, taken from literature, in the CFPS model.  
 339 PEP was modeled as an inhibitor for phosphofructokinase [29, 30], PEP  
 340 carboxykinase [29], PEP synthetase [29, 31], isocitrate dehydrogenase [29,  
 341 32], and isocitrate lyase/malate synthase [29, 32, 33], and as an activator for  
 342 fructose-biphosphatase [29, 34, 35, 36]. AKG was modeled as an inhibitor  
 343 for citrate synthase [29, 37, 38] and isocitrate lyase/malate synthase [29, 33].  
 344 3PG was modeled as an inhibitor for isocitrate lyase/malate synthase [29, 33].  
 345 FDP was modeled as an activator for pyruvate kinase [29, 39] and PEP  
 346 carboxylase [29, 40]. Pyruvate was modeled as an inhibitor for pyruvate  
 347 dehydrogenase [29, 41, 42] and as an activator for lactate dehydrogenase  
 348 [43]. Acetyl CoA was modeled as an inhibitor for malate dehydrogenase [29].

349 The symbol  $\bar{r}_T$  denotes the transcription rate,  $u$  denotes a promoter spe-  
 350 cific activation model, and  $\bar{r}_d$  denotes the transcript degradation rate. The  
 351 transcription rate was modeled as:

$$\bar{r}_T = k_{cat}^T \cdot R_T \left( \frac{G_P}{K_G^T + G_P} \right) \prod_{s \in m_T^-} \frac{x_s}{K_s^T + x_s} \quad (6)$$

352 where  $k_{cat}^T$  denotes the maximum transcription rate,  $R_T$  denotes the RNA  
 353 polymerase concentration,  $G_P$  denotes the gene concentration,  $K_G^T$  denotes  
 354 the gene saturation constant,  $K_s^T$  denotes the saturation constant for species  
 355  $s$ , and  $m_T^-$  denotes the set of *reactants* for transcription: ATP, GTP, CTP,  
 356 UTP, and water. In this study, we considered only the T7 promoter; we have  
 357 previously estimated  $u \simeq 0.95$  for a T7 [REF-MIKE]. While transcription was  
 358 modeled as saturating with respect to gene concentration, the gene was not  
 359 considered a reactant in the stoichiometry as it was not consumed. Transcript  
 360 degradation was modeled as first-order in transcript:

$$\bar{r}_d = k_d \cdot m \quad (7)$$

361 where  $k_d$  denotes the transcript degradation rate constant.

362 The symbol  $\bar{r}_X$  denotes the translation rate, which was modeled as:

$$\bar{r}_X = k_{cat}^X \cdot R_X \left( \frac{m}{K_{mRNA}^X + m} \right) \prod_{s \in m_X^-} \frac{x_s}{K_s^X + x_s} \quad (8)$$

363 where  $k_{cat}^X$  denotes the maximum translation rate,  $R_X$  denotes the ribo-  
 364 some concentration,  $m$  denotes the transcript concentration,  $K_{mRNA}^X$  denotes  
 365 the transcript saturation constant,  $K_s^X$  denotes the saturation constant for  
 366 species  $s$ , and  $m_X^-$  denotes the set of *reactants* for translation: GTP, wa-  
 367 ter, and the 20 species representing tRNA charged with amino acids. While  
 368 translation was modeled as saturating with respect to transcript concentra-  
 369 tion, the transcript was not considered a reactant in the stoichiometry as it  
 370 is not consumed.

371 *Estimation of kinetic model parameters.*

372 We estimated an ensemble of kinetic parameter sets using a constrained  
 373 Markov Chain Monte Carlo (MCMC) random walk strategy. We have used  
 374 this technique previously to estimate numerically stable low-error parameter  
 375 sets for signal transduction models [44, 45]. Starting from a small number  
 376 of parameter sets estimated by inspection and literature, we calculated the  
 377 cost function, equal to the sum-squared-error between experimental data and  
 378 model predictions:

$$\text{cost} = \sum_{i=1}^{\mathcal{D}} \left[ \frac{w_i}{\mathcal{Y}_i^2} \sum_{j=1}^{\mathcal{T}_i} \left( y_{ij} - x_{i|t(j)} \right)^2 \right] \quad (9)$$

379 where  $\mathcal{D}$  denotes the number of datasets ( $\mathcal{D} = 37$ ),  $w_i$  denotes the weight  
 380 of the  $i^{th}$  dataset,  $\mathcal{T}_i$  denotes the number of timepoints in the  $i^{th}$  dataset,  
 381  $t(j)$  denotes the  $j^{th}$  timepoint,  $y_{ij}$  denotes the measurement value of the  $i^{th}$   
 382 dataset at the  $j^{th}$  timepoint, and  $x_{i|t(j)}$  denotes the simulated value of the  
 383 metabolite corresponding to the  $i^{th}$  dataset, interpolated to the  $j^{th}$  timepoint.  
 384 Lastly, the cost function was scaled by the maximum experimental value in  
 385 the  $i^{th}$  dataset,  $\mathcal{Y}_i = \max_j (y_{ij})$ . We then perturbed each model parameter  
 386 between an upper and lower bound that varied by parameter type:

$$k_i^{new} = \min(\max(k_i \cdot \exp(a \cdot r_i), l_i), u_i) \quad i = 1, 2, \dots, \mathcal{P} \quad (10)$$

387 where  $\mathcal{P}$  denotes the number of parameters ( $\mathcal{P} = 815$ ), which includes 204  
 388 maximum reaction rates ( $V^{max}$ ), 204 enzyme activity decay constants, 548

389 saturation constants ( $K_{js}$ ), and 34 control parameters,  $k_i^{new}$  denotes the new  
390 value of the  $i^{th}$  parameter,  $k_i$  denotes the current value of the  $i^{th}$  param-  
391 eter,  $a$  denotes a distribution variance,  $r_i$  denotes a random sample from  
392 the normal distribution,  $l_i$  denotes the lower bound for that parameter type,  
393 and  $u_i$  denotes the upper bound for that parameter type. Model parameters  
394 were constrained by literature collected using the BioNumbers database [22].  
395 Transcription, translation, and mRNA degradation were bounded within a  
396 factor of two of their reference values. A characteristic cell-free enzyme con-  
397 centration of 170 nM was calculated by diluting the one-tenth maximal con-  
398 centration of *lacZ* (5  $\mu$ M, BNID 100735) by a cell-free dilution factor of 30.  
399 This enzyme level was then used to calculate rate maxima from turnover  
400 numbers for various enzymes from BioNumbers (Table 4). Rate maxima  
401 were bounded within one order of magnitude of the reference value where  
402 available; all other rate maxima were bounded within two orders of magni-  
403 tude of the geometric mean of the available values. Enzyme activity decay  
404 constants were bounded between 0 and 1 h<sup>-1</sup>, corresponding to half lives of  
405 42 minutes and infinity. Saturation constants were bounded between 0.0001  
406 and 10 mM. Control gain parameters were bounded between 0.05 and 10  
407 (dimensionless), while order parameters were bounded between 0.02 and 10  
408 (dimensionless).

409 For each newly generated parameter set, we re-solved the balance equa-  
410 tions and calculated the cost function. All sets with a lower cost were ac-  
411 cepted into the ensemble. Sets with a higher cost were also accepted into the  
412 ensemble, if they satisfied the acceptance constraint:

$$\mathcal{R}_{0,1}^{uniform} < \exp\left(-\alpha \cdot \frac{\text{cost}_{new} - \text{cost}}{\text{cost}}\right) \quad (11)$$

413 where  $\mathcal{R}_{0,1}^{uniform}$  denotes a random number taken from a uniform distribution  
414 between 0 and 1,  $\text{cost}$  denotes the cost of the current parameter set,  $\text{cost}_{new}$   
415 denotes the cost of the new parameter set, and  $\alpha$  denotes a tunable parameter  
416 to control the tolerance to high-error sets. A total of 3,875 sets were accepted  
417 into the initial ensemble, from which we selected  $N = 100$  with minimal error  
418 for the final ensemble.

419 Lastly, a random ensemble of 100 parameter sets was generated within the  
420 same parameter bounds as the trained ensemble. The randomized parameter  
421 sets were generated using a Monte Carlo approach: each parameter was  
422 taken from a uniform distribution constructed between its upper and lower

423 bounds. The model equations were then solved and the cost function, and  
 424 the Akaike information criterion (AIC) were calculated for each of the 37  
 425 separate experimental datasets.

426 *Reaction group knockouts.*

427 The metabolic network was divided into 19 reaction groups: glycoly-  
 428 sis/gluconeogenesis, pentose phosphate, Entner-Doudoroff, TCA cycle, ox-  
 429 idative phosphorylation, cofactor reactions, anaplerotic/glyoxylate reactions,  
 430 overflow metabolism, folate synthesis, purine/pyrimidine reactions, alanine/  
 431 aspartate/asparagine synthesis, glutamate/glutamine synthesis, arginine/proline  
 432 synthesis, glycine/serine synthesis, cysteine/methionine synthesis, threonine/  
 433 lysine synthesis, histidine synthesis, tyrosine/tryptophan/phenylalanine syn-  
 434 thesis, and valine/leucine/isoleucine synthesis. Each reaction group and pair  
 435 of reaction groups were removed and the model was re-solved; the CAT pro-  
 436 ductivity was then calculated and subtracted from that of the base case (no  
 437 knockouts):

$$P_{ii} = |\Delta\text{CAT} - \Delta\text{CAT}_{\Delta R_i}| \quad (12)$$

$$P_{ij} = |\Delta\text{CAT} - \Delta\text{CAT}_{\Delta R_i \Delta R_j}| \quad (13)$$

$$P_i^{\text{total}} = P_{ii} + \sum_j P_{ij} \quad (14)$$

438 where  $P_{ii}$  denotes the first-order productivity knockout effect for reaction  
 439 group  $i$ ,  $P_{ij}$  denotes the pairwise productivity knockout effect for reaction  
 440 groups  $i$  and  $j$ ,  $P_i^{\text{total}}$  denotes the total-order productivity knockout effect for  
 441 reaction group  $i$ ,  $\Delta\text{CAT}$  denotes the base case CAT productivity,  $\Delta\text{CAT}_{\Delta R_i}$  de-  
 442 notes the CAT productivity when reaction group  $i$  is knocked out,  $\Delta\text{CAT}_{\Delta R_i \Delta R_j}$   
 443 denotes the CAT productivity when reaction groups  $i$  and  $j$  are knocked out,  
 444 and  $|x|$  denotes the absolute value of  $x$ . The system state, defined as the  
 445 model predictions for all species for which experimental data exists, was also  
 446 recorded for each knockout and compared to the base case:

$$S_{ii} = \|\mathbf{x}^{\text{data}} - \mathbf{x}_{\Delta R_i}^{\text{data}}\|_2 \quad (15)$$

$$S_{ij} = \|\mathbf{x}^{\text{data}} - \mathbf{x}_{\Delta R_i \Delta R_j}^{\text{data}}\|_2 \quad (16)$$

$$S_i^{\text{total}} = S_{ii} + \sum_j S_{ij} \quad (17)$$



447 where  $S_{ii}$  denotes the first-order system state knockout effect for reaction  
 448 group  $i$ ,  $S_{ij}$  denotes the pairwise system state knockout effect for reaction  
 449 groups  $i$  and  $j$ ,  $S_i^{total}$  denotes the total-order system state knockout effect  
 450 for reaction group  $i$ ,  $\mathbf{x}^{data}$  denotes the base-case system state,  $\mathbf{x}_{\Delta R_i}^{data}$  denotes  
 451 the system state when reaction group  $i$  is knocked out,  $\mathbf{x}_{\Delta R_i \Delta R_j}^{data}$  denotes  
 452 the system state when reaction groups  $i$  and  $j$  are knocked out, and  $\|x\|_2$   
 453 denotes the  $l^2$  norm of  $x$ . In order to not dominate the colorbar, the total-  
 454 order knockout effects were normalized to the same ranges as the main arrays  
 455 (first-order and pairwise effects).

456 *Sensitivity of CAT productivity to transcription and translation.*

457 The catalytic rates of transcription and translation were sampled within  
 458 one order of magnitude on each side from the best-fit values. The parameter  
 459 bounds were set as the base-10 logarithms of the upper and lower bound  
 460 for each rate; then, 10 was taken to the power of each parameter sample to  
 461 obtain the catalytic rates:

$$k_{cat}^{T,sample} \in \left[ \log_{10} \left( k_{cat}^{T,bf} / 10 \right), \log_{10} \left( k_{cat}^{T,bf} * 10 \right) \right] \quad (18)$$

$$k_{cat}^{X,sample} \in \left[ \log_{10} \left( k_{cat}^{X,bf} / 10 \right), \log_{10} \left( k_{cat}^{X,bf} * 10 \right) \right] \quad (19)$$

$$\Delta CAT = f \left( 10^{k_{cat}^{T,sample}}, 10^{k_{cat}^{X,sample}} \right) \quad (20)$$

462 where  $k_{cat}^{T,sample}$  denotes the sample of the transcription catalytic rate,  $k_{cat}^{X,sample}$   
 463 denotes the sample of the translation catalytic rate,  $k_{cat}^{T,bf}$  denotes the best-  
 464 fit value of the transcription catalytic rate, and  $k_{cat}^{X,bf}$  denotes the best-fit  
 465 value of the translation catalytic rate. The sampling was performed using  
 466 the Sensitivity Analysis Library in Python (Numpy) with 3000 samples [46].

467 *Calculation of energy efficiency.*

468 Energy efficiency was calculated as the ratio of transcription and trans-  
 469 lation (weighted by the appropriate energy species coefficients) to ATP gen-

470 eration:

$$\text{Efficiency} = \frac{\Delta_{\tau}\text{mRNA} \cdot \alpha_T + \Delta_{\tau}\text{CAT} \cdot \alpha_X}{\sum_{j \in \{R_{ATP}\}} \int_{\tau} \sigma_j^{ATP} \bar{r}_j} \quad (21)$$

$$\alpha_T = 2 \cdot (\text{ATP}_T + \text{CTP}_T + \text{GTP}_T + \text{UTP}_T) \quad (22)$$

$$\alpha_X = 2 \cdot \text{ATP}_X + \text{GTP}_X \quad (23)$$

471 where  $\Delta_{\tau}\text{mRNA}$  denotes the net accumulation of mRNA in phase  $\tau$  (first, sec-  
472 ond, or overall),  $\Delta_{\tau}\text{CAT}$  denotes the net accumulation of protein in phase  
473  $\tau$ ,  $\alpha_T$  denotes the energy cost of transcription,  $\alpha_X$  denotes the energy cost  
474 of translation,  $R_{ATP}$  denotes the set of ATP-producing reactions, and  $\sigma_j^{ATP}$   
475 denotes the ATP coefficient for reaction  $j$ .  $\text{ATP}_T$ ,  $\text{CTP}_T$ ,  $\text{GTP}_T$ ,  $\text{UTP}_T$   
476 denote the stoichiometric coefficients of each energy species for transcrip-  
477 tion, and  $\text{ATP}_X$ ,  $\text{GTP}_X$  denote the stoichiometric coefficients of ATP and  
478 GTP for translation. During transcription and tRNA charging, triphosphate  
479 molecules are consumed with monophosphates as byproducts; this is the rea-  
480 son for the factors of 2 on  $\text{ATP}_T$ ,  $\text{CTP}_T$ ,  $\text{GTP}_T$ ,  $\text{UTP}_T$ , and  $\text{ATP}_X$ .

481 *Availability of model code.*

482 The cell free model equations, and the parameter estimation procedure,  
483 were implemented in the Julia programming language. The model equa-  
484 tions were solved using the CVODE solver of the SUNDIALS suite [47], with  
485 an absolute tolerance and relative tolerance of  $1e^{-9}$ ; any sets exhibiting  
486 CVODEerrors were discarded. Thus, the numerical stability of all paramet-  
487 ers in the ensemble was ensured. The model code and parameter ensemble  
488 is freely available under an MIT software license and can be downloaded from  
489 <http://www.varnerlab.org>.

490 **Competing interests**

491 The authors declare that they have no competing interests.

492 **Author's contributions**

493 J.V directed the modeling study. K.C and J.S conducted the cell-free pro-  
494 tein synthesis experiments. J.V, J.W, and N.H developed the cell-free protein  
495 synthesis mathematical model, and parameter ensemble. The manuscript was  
496 prepared and edited for publication by J.S, N.H, M.V, J.W and J.V.

497 **Acknowledgements**

498 We gratefully acknowledge the suggestions from the anonymous reviewers  
499 to improve this manuscript.

500 **Funding**

501 This study was supported by a National Science Foundation Graduate  
502 Research Fellowship (DGE-1333468) to N.H. Research reported in this pub-  
503 lication was also supported by the Systems Biology Coagulopathy of Trauma  
504 Program with support from the US Army Medical Research and Materiel  
505 Command under award number W911NF-10-1-0376.

- 506 [1] K. Pardee, S. Slomovic, P. Q. Nguyen, J. W. Lee, N. Donghia, D. Bur-  
507 rill, T. Ferrante, F. R. McSorley, Y. Furuta, A. Vernet, M. Lewandowski,  
508 C. N. Boddy, N. S. Joshi, J. J. Collins, Portable, on-demand biomolec-  
509 ular manufacturing, *Cell* 167 (2016) 248–59.e12.
- 510 [2] M. C. Jewett, K. A. Calhoun, A. Voloshin, J. J. Wu, J. R. Swartz,  
511 An integrated cell-free metabolic platform for protein production and  
512 synthetic biology, *Mol Syst Biol* 4 (2008) 220.
- 513 [3] J. H. Matthaei, M. W. Nirenberg, Characteristics and stabilization of  
514 dnaase-sensitive protein synthesis in *e. coli* extracts, *Proc Natl Acad Sci*  
515 *U S A* 47 (1961) 1580–8.
- 516 [4] M. W. Nirenberg, J. H. Matthaei, The dependence of cell-free protein  
517 synthesis in *e. coli* upon naturally occurring or synthetic polyribonu-  
518 cleotides, *Proc Natl Acad Sci U S A* 47 (1961) 1588–602.
- 519 [5] A. Spirin, V. Baranov, L. Ryabova, S. Ovodov, Y. Alakhov, A contin-  
520 uous cell-free translation system capable of producing polypeptides in  
521 high yield, *Science* 242 (1988) 1162–1164.
- 522 [6] D.-M. Kim, J. R. Swartz, Regeneration of adenosine triphosphate from  
523 glycolytic intermediates for cell-free protein synthesis, *Biotechnology*  
524 *and Bioengineering* 74 (2001) 309–316.
- 525 [7] Y. Lu, J. P. Welsh, J. R. Swartz, Production and stabilization of the  
526 trimeric influenza hemagglutinin stem domain for potentially broadly  
527 protective influenza vaccines, *Proc Natl Acad Sci U S A* 111 (2014)  
528 125–30.
- 529 [8] C. E. Hodgman, M. C. Jewett, Cell-free synthetic biology: thinking  
530 outside the cell, *Metab Eng* 14 (2012) 261–9.
- 531 [9] M. C. Jewett, J. R. Swartz, Mimicking the *escherichia coli* cytoplasmic  
532 environment activates long-lived and efficient cell-free protein synthesis,  
533 *Biotechnology and Bioengineering* 86 (2004) 19–26.
- 534 [10] J. Garamella, R. Marshall, M. Rustad, V. Noireaux, The all *e. coli* tx-tl  
535 toolbox 2.0: A platform for cell-free synthetic biology, *ACS Synth Biol*  
536 5 (2016) 344–55.

- 537 [11] J. A. Wayman, J. D. Varner, Biological systems modeling of metabolic  
538 and signaling networks, *Curr Opin Chem Eng* 2 (2013).
- 539 [12] A. G. Fredrickson, Formulation of structured growth models, *Biotechnol*  
540 *Bioeng* 18 (1976) 1481–6.
- 541 [13] M. M. Domach, S. K. Leung, R. E. Cahn, G. G. Cocks, M. L. Shuler,  
542 Computer model for glucose-limited growth of a single cell of *escherichia*  
543 *coli b/r-a*, *Biotechnol Bioeng* 26 (1984) 203–16.
- 544 [14] D. Steinmeyer, M. Shuler, Structured model for *Saccharomyces cere-*  
545 *visiae.*, *Chem Eng Sci* 44 (1989) 2017–30.
- 546 [15] P. Wu, N. G. Ray, M. L. Shuler, A single-cell model for cho cells, *Ann*  
547 *N Y Acad Sci* 665 (1992) 152–87.
- 548 [16] M. Castellanos, D. B. Wilson, M. L. Shuler, A modular minimal cell  
549 model: purine and pyrimidine transport and metabolism, *Proc Natl*  
550 *Acad Sci U S A* 101 (2004) 6681–6.
- 551 [17] J. C. Atlas, E. V. Nikolaev, S. T. Browning, M. L. Shuler, Incorporating  
552 genome-wide dna sequence information into a dynamic whole-cell model  
553 of *escherichia coli*: application to dna replication, *IET Syst Biol* 2 (2008)  
554 369–82.
- 555 [18] J. R. Karr, J. C. Sanghvi, D. N. Macklin, M. V. Gutschow, J. M. Jacobs,  
556 B. Bolival, N. Assad-Garcia, J. I. Glass, M. W. Covert, A whole-cell  
557 computational model predicts phenotype from genotype, *Cell* 150 (2012)  
558 389–401.
- 559 [19] A. Khodayari, C. D. Maranas, A genome-scale *Escherichia coli* ki-  
560 netic metabolic model k-ecoli457 satisfying flux data for multiple mutant  
561 strains, *Nat Commun* 7 (2016) 13806.
- 562 [20] S. Andreatzi, A. Chakrabarti, K. C. Soh, A. Burgard, T. H. Yang,  
563 S. Van Dien, L. Miskovic, V. Hatzimanikatis, Identification of metabolic  
564 engineering targets for the enhancement of 1,4-butanediol production in  
565 recombinant *E. coli* using large-scale kinetic models, *Metab. Eng.* 35  
566 (2016) 148–159.

- 567 [21] J. A. Wayman, A. Sagar, J. D. Varner, Dynamic modeling of cell-free  
568 biochemical networks using effective kinetic models, *Processes* 3 (2015)  
569 138.
- 570 [22] R. Milo, P. Jorgensen, U. Moran, G. Weber, M. Springer, Bionumbers–  
571 the database of key numbers in molecular and cell biology, *Nucleic Acids*  
572 *Res* 38 (2009) 750–3.
- 573 [23] A. M. Feist, C. S. Henry, J. L. Reed, M. Krummenacker, A. R. Joyce,  
574 P. D. Karp, L. J. Broadbelt, V. Hatzimanikatis, B. Ø. Palsson, A  
575 genome-scale metabolic reconstruction for *Escherichia coli* K-12 MG1655  
576 that accounts for 1260 ORFs and thermodynamic information, *Mol Syst*  
577 *Biol* 3 (2007) 121.
- 578 [24] T. E. Allen, B. Ø. Palsson, Sequence-based analysis of metabolic de-  
579 mands for protein synthesis in prokaryotes, *J Theor Biol* 220 (2003)  
580 1–18.
- 581 [25] M. Vilkhovoy, N. Horvath, C.-h. Shih, J. Wayman, K. Calhoun,  
582 J. Swartz, J. Varner, Sequence specific modeling of *e. coli* cell-free pro-  
583 tein synthesis, *bioRxiv* (2017).
- 584 [26] A. Bar-Even, E. Noor, Y. Savir, W. Liebermeister, D. Davidi, D. S.  
585 Tawfik, R. Milo, The moderately efficient enzyme: Evolutionary and  
586 physicochemical trends shaping enzyme parameters, *Biochemistry* 50  
587 (2011).
- 588 [27] I. Sobol, Global sensitivity indices for nonlinear mathematical models  
589 and their monte carlo estimates., *Math Comput Simulat* 55 (2001) 271–  
590 80.
- 591 [28] J. Swartz, A pure approach to constructive biology, *Nat Biotechnol* 19  
592 (2001) 732–3.
- 593 [29] O. Kotte, J. B. Zaugg, M. Heinemann, Bacterial adaptation through  
594 distributed sensing of metabolic fluxes, *Mol Syst Biol* 6 (2010) 355.
- 595 [30] R. Cabrera, M. Baez, H. M. Pereira, A. Caniuguir, R. C. Garratt,  
596 J. Babul, The crystal complex of phosphofructokinase-2 of *Escherichia*  
597 *coli* with fructose-6-phosphate: kinetic and structural analysis of the  
598 allosteric ATP inhibition, *J Biol Chem* 286 (2011) 5774–83.

- 599 [31] M. Chulavatnatol, D. E. Atkinson, Phosphoenolpyruvate synthetase  
600 from *Escherichia coli*. Effects of adenylate energy charge and modifier  
601 concentrations, *J Biol Chem* 248 (1973) 2712–5.
- 602 [32] T. Ogawa, K. Murakami, H. Mori, N. Ishii, M. Tomita, M. Yoshin,  
603 Role of phosphoenolpyruvate in the NADP-isocitrate dehydrogenase and  
604 isocitrate lyase reaction in *Escherichia coli*, *J Bacteriol* 189 (2007) 1176–  
605 8.
- 606 [33] C. MacKintosh, H. G. Nimmo, Purification and regulatory properties  
607 of isocitrate lyase from *Escherichia coli* ML308, *Biochem J* 250 (1988)  
608 25–31.
- 609 [34] J. L. Donahue, J. L. Bownas, W. G. Niehaus, T. J. Larson, Purification  
610 and characterization of *glpX*-encoded fructose 1, 6-bisphosphatase, a  
611 new enzyme of the glycerol 3-phosphate regulon of *Escherichia coli*, *J*  
612 *Bacteriol* 182 (2000) 5624–7.
- 613 [35] J. K. Hines, H. J. Fromm, R. B. Honzatko, Novel allosteric activation  
614 site in *Escherichia coli* fructose-1,6-bisphosphatase, *J Biol Chem* 281  
615 (2006) 18386–93.
- 616 [36] J. K. Hines, H. J. Fromm, R. B. Honzatko, Structures of activated  
617 fructose-1,6-bisphosphatase from *Escherichia coli*. Coordinate regulation  
618 of bacterial metabolism and the conservation of the R-state, *J Biol Chem*  
619 282 (2007) 11696–704.
- 620 [37] D. S. Pereira, L. J. Donald, D. J. Hosfield, H. W. Duckworth, Active  
621 site mutants of *Escherichia coli* citrate synthase. Effects of mutations on  
622 catalytic and allosteric properties, *J Biol Chem* 269 (1994) 412–7.
- 623 [38] M. S. Robinson, R. A. Easom, M. J. Danson, P. D. Weitzman, Cit-  
624 rate synthase of *Escherichia coli*. Characterisation of the enzyme from a  
625 plasmid-cloned gene and amplification of the intracellular levels, *FEBS*  
626 *Lett* 154 (1983) 51–4.
- 627 [39] T. Zhu, M. F. Bailey, L. M. Angley, T. F. Cooper, R. C. Dobson, The  
628 quaternary structure of pyruvate kinase type 1 from *Escherichia coli* at  
629 low nanomolar concentrations, *Biochimie* 92 (2010) 116–20.

- 630 [40] R. C. Wohl, G. Markus, Phosphoenolpyruvate carboxylase of Es-  
631 cherichia coli. Purification and some properties, *J Biol Chem* 247 (1972)  
632 5785–92.
- 633 [41] S. Kale, P. Arjunan, W. Furey, F. Jordan, A dynamic loop at the  
634 active center of the Escherichia coli pyruvate dehydrogenase complex E1  
635 component modulates substrate utilization and chemical communication  
636 with the E2 component, *J Biol Chem* 282 (2007) 28106–16.
- 637 [42] P. Arjunan, N. Nemeria, A. Brunskill, K. Chandrasekhar, M. Sax,  
638 Y. Yan, F. Jordan, J. R. Guest, W. Furey, Structure of the pyruvate de-  
639 hydrogenase multienzyme complex E1 component from Escherichia coli  
640 at 1.85 Å resolution, *Biochemistry* 41 (2002) 5213–21.
- 641 [43] S. Okino, M. Suda, K. Fujikura, M. Inui, H. Yukawa, Production of D-  
642 lactic acid by *Corynebacterium glutamicum* under oxygen deprivation,  
643 *Appl Microbiol Biotechnol* 78 (2008) 449–54.
- 644 [44] R. Tasseff, S. Nayak, S. Salim, P. Kaushik, N. Rizvi, J. D. Varner, Anal-  
645 ysis of the molecular networks in androgen dependent and independent  
646 prostate cancer revealed fragile and robust subsystems, *PLoS One* 5  
647 (2010) e8864.
- 648 [45] R. Tasseff, S. Nayak, S. O. Song, A. Yen, J. D. Varner, Modeling and  
649 analysis of retinoic acid induced differentiation of uncommitted precursor  
650 cells, *Integr Biol (Camb)* 3 (2011) 578–91.
- 651 [46] J. D. Herman, <http://jdherman.github.io/salib/>, ????
- 652 [47] A. C. Hindmarsh, P. N. Brown, K. E. Grant, S. L. Lee, R. Serban,  
653 D. E. Shumaker, C. S. Woodward, SUNDIALS: Suite of nonlinear and  
654 differential/algebraic equation solvers, *ACM T Math Software (TOMS)*  
655 31 (2005) 363–396.
- 656 [48] T. Kigawa, Y. Muto, S. Yokoyama, Cell-free synthesis and amino acid-  
657 selective stable isotope labeling of proteins for NMR analysis, *J Biomolec*  
658 *NMR* 6 (1995) 129–134.



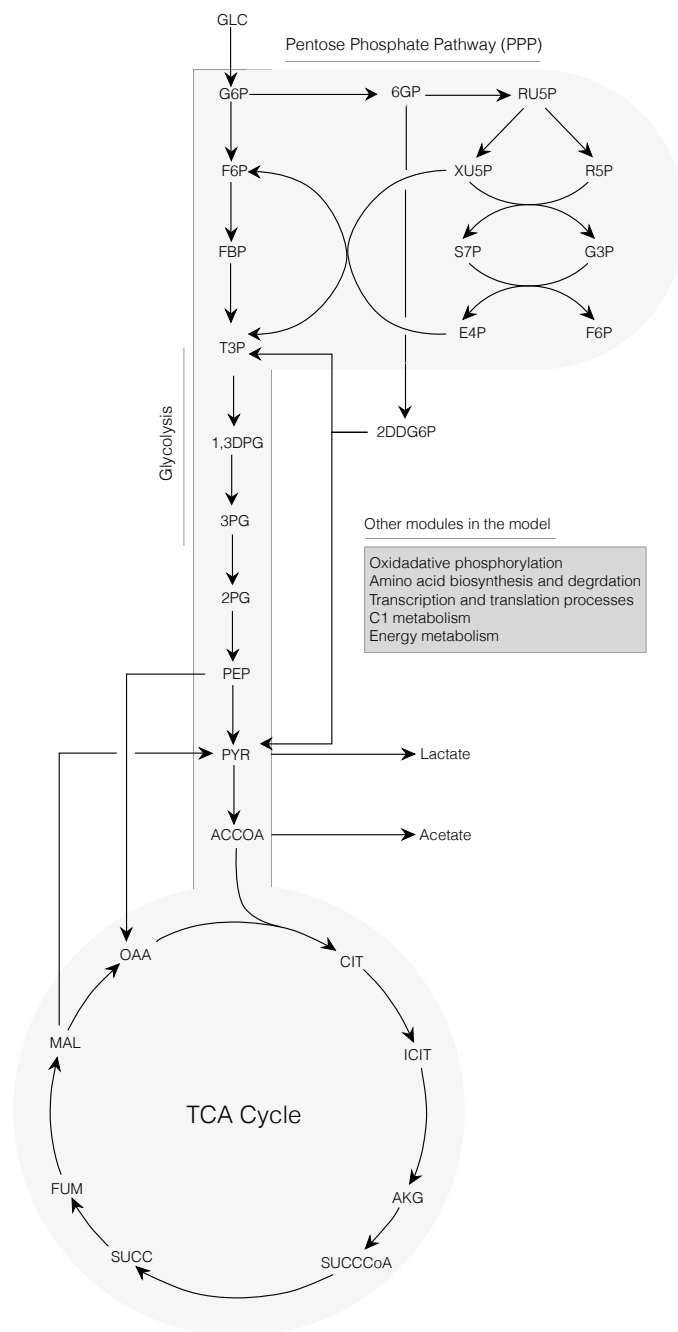

Figure 1: Schematic of the core portion of the cell-free *E. coli* metabolic network. Metabolites of glycolysis, pentose phosphate pathway, Entner-Doudoroff pathway, and TCA cycle are shown. Metabolites of oxidative phosphorylation, amino acid biosynthesis and degradation, transcription/translation, chorismate metabolism, and energy metabolism are not shown.

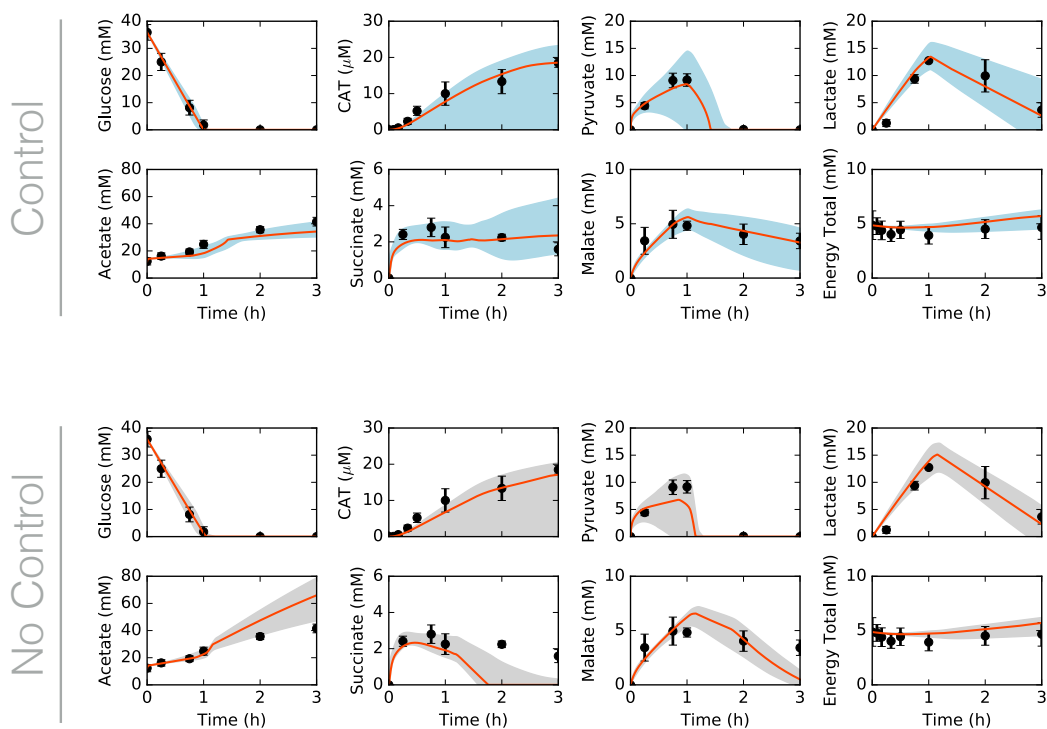

Figure 2: Central carbon metabolism in the presence (top) and absence (bottom) of allosteric control, including glucose (substrate), CAT (product), and intermediates, as well as total concentration of energy species. Best-fit parameter set (orange line) versus experimental data (points). 95% confidence interval (blue or gray shaded region) over the ensemble of 100 sets.

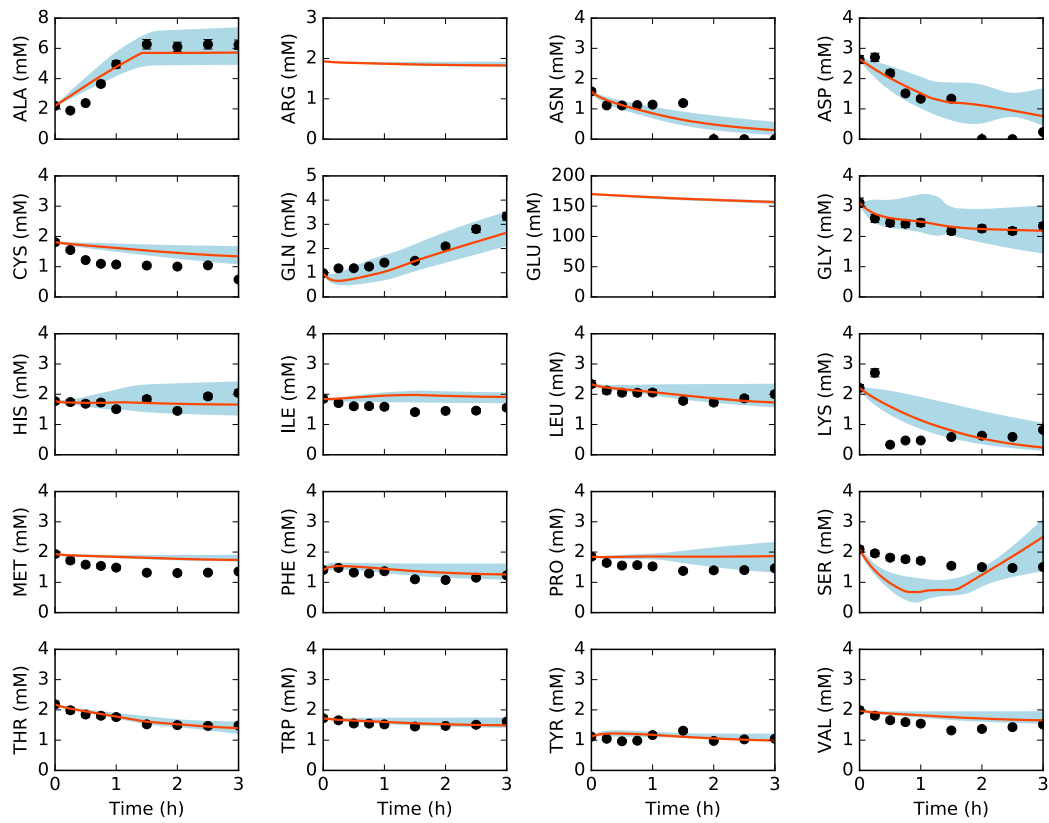

Figure 3: Amino acids in the presence of allosteric control. Best-fit parameter set (orange line) versus experimental data (points). 95% confidence interval (blue shaded region) over the ensemble of 100 sets.

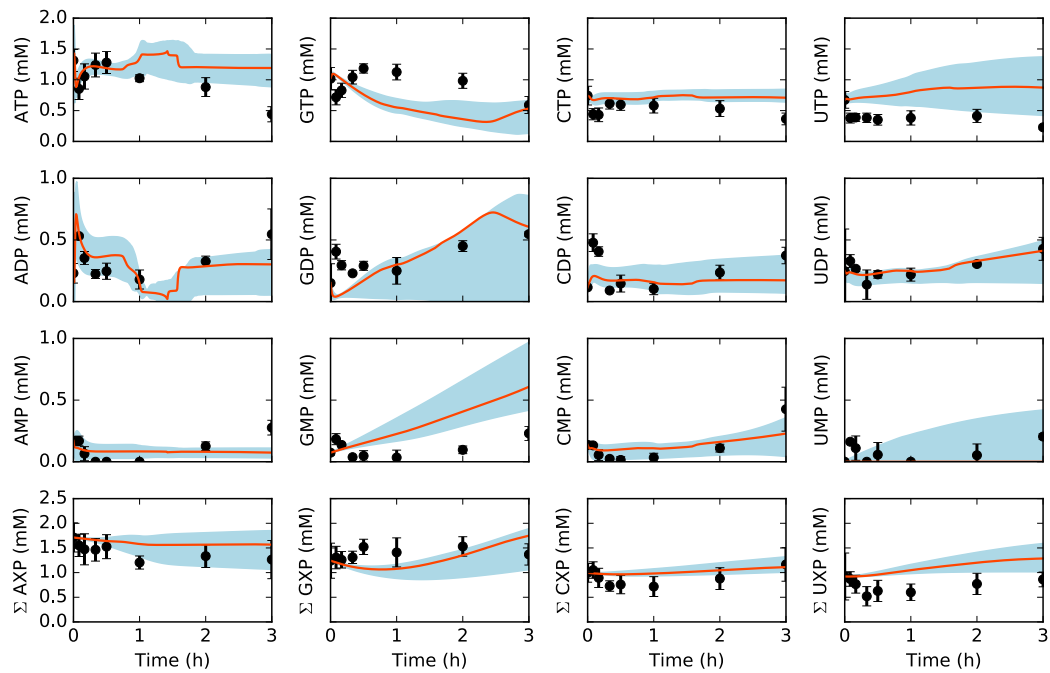

Figure 4: Energy species and energy totals by base in the presence of allosteric control. Best-fit parameter set (orange line) versus experimental data (points). 95% confidence interval (blue shaded region) over the ensemble of 100 sets.

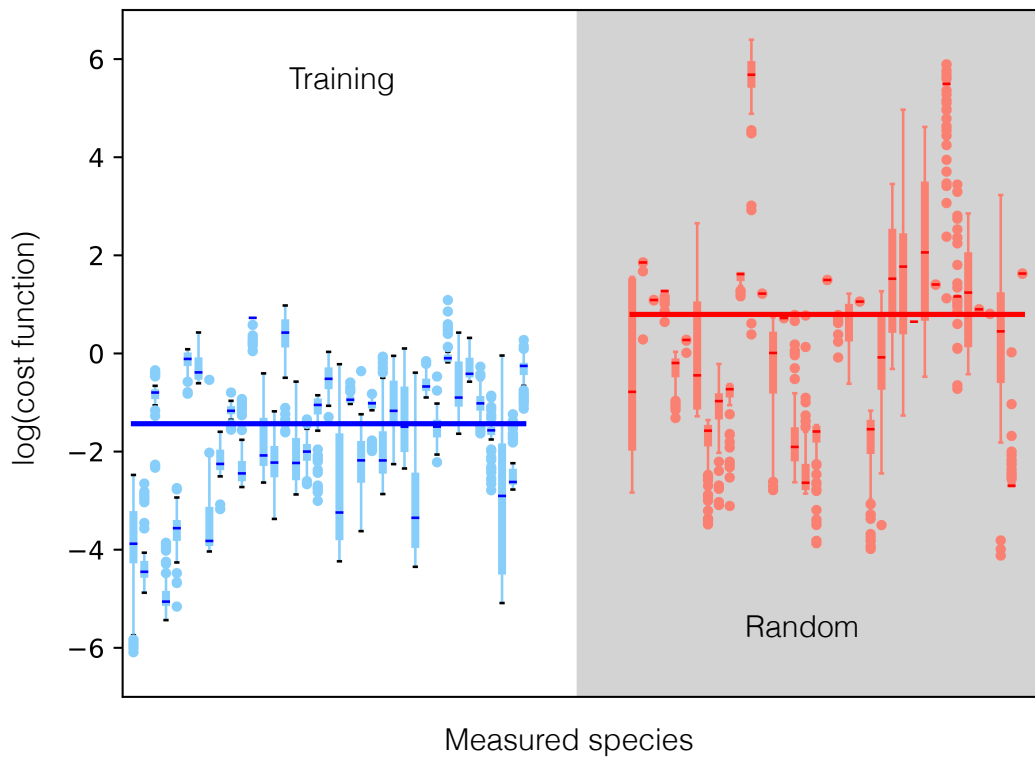

Figure 5: Log of cost function (residual between training data and model simulations) across 37 datasets for data-trained ensemble (blue) and randomly generated ensemble (red, gray background). Median (bars), interquartile range (boxes), range excluding outliers (thin lines), and outliers (circles) for each dataset. Median across all datasets (large bar overlaid).

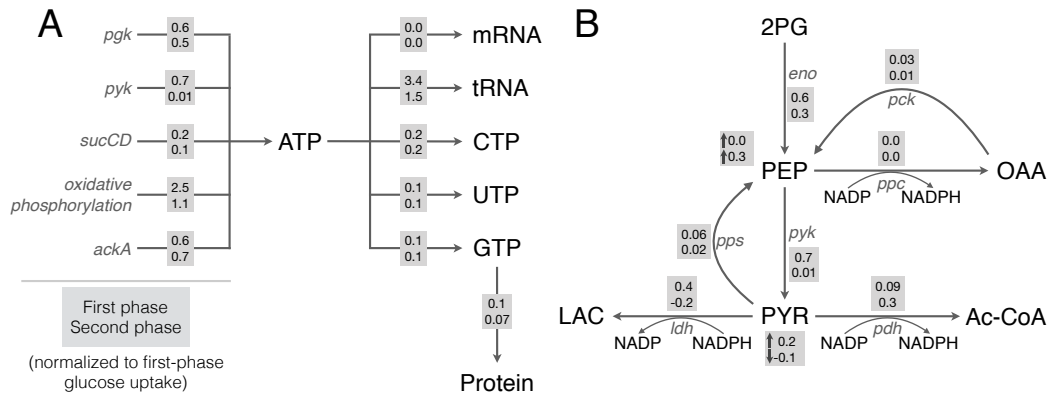

Figure 6: Key reaction fluxes of the network, in the first (gray boxes, top row) and second (gray boxes, bottom row) phases of metabolism. A. Fluxes of ATP generation and consumption, and GTP consumption toward protein synthesis. B. Fluxes of glycolysis and lactate and acetate metabolism. Fluxes are normalized to the first-phase glucose uptake rate. For PEP and pyruvate, accumulation (normalized to glucose uptake) is also shown.

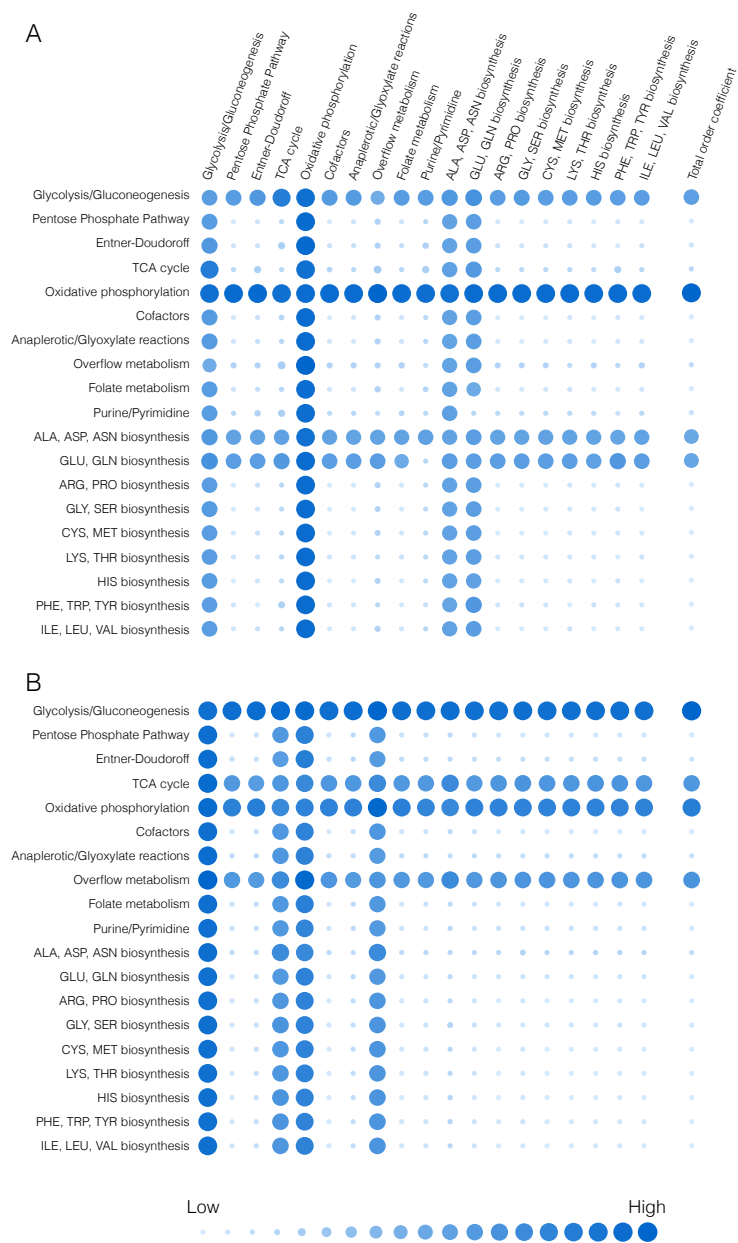

Figure 7: Effect of group knockouts on system. A. Change in CAT productivity when one (diagonal) or two (off-diagonal) reaction groups are turned off. B. Change in system state (only species for which data exist) when one (diagonal) or two (off-diagonal) reaction groups are turned off. Total-order effect for each group calculated as the sum of first-order effect and all pairwise effects. Larger and darker circles represent greater effects.

Table 1: Breakdown of ATP generation. Flux through ATP-generating pathways in the first and second phases as percentages of total ATP generation in that phase.

| <b>Name</b> | <b>Index</b> | <b>Reaction</b>                                                                                        | <b>Phase 1</b> | <b>Phase 2</b> |
|-------------|--------------|--------------------------------------------------------------------------------------------------------|----------------|----------------|
| R_pgk       | 12           | $13\text{DPG} + \text{ADP} \rightarrow 3\text{PG} + \text{ATP}$                                        | 14%            | 21%            |
| R_pyk       | 18           | $\text{ADP} + \text{PEP} \rightarrow \text{ATP} + \text{PYR}$                                          | 16%            | <1%            |
| R_sucCD     | 45           | $\text{ADP} + \text{P}_i + \text{SUCCOA} \rightarrow \text{ATP} + \text{COA} + \text{SUCC}$            | 3%             | 5%             |
| R_atp       | 55           | $\text{ADP} + \text{P}_i + 4 \text{H}_e \rightarrow \text{ATP} + 4 \text{H} + \text{H}_2\text{O}$      | 54%            | 46%            |
| R_ackA      | 68           | $\text{ACTP} + \text{ADP} \rightarrow \text{AC} + \text{ATP}$                                          | 12%            | 28%            |
| R_asn_deg   | 102          | $\text{ASN} + \text{AMP} + \text{PP}_i \rightarrow \text{NH}_3 + \text{ASP} + \text{ATP}$              | <1%            | <1%            |
| R_thr_deg3  | 109          | $\text{THR} + \text{P}_i + \text{ADP} \rightarrow \text{NH}_3 + \text{FOR} + \text{ATP} + \text{PROP}$ | <1%            | <1%            |



Table 2: Breakdown of ATP consumption. Flux through ATP-consuming pathways in the first and second phases as percentages of total ATP consumption in that phase.

| Name          | Index   | Reaction                                                                                                                     | Phase 1 | Phase 2 |
|---------------|---------|------------------------------------------------------------------------------------------------------------------------------|---------|---------|
| R_glk_atp     | 1       | $\text{ATP} + \text{GLC} \rightarrow \text{ADP} + \text{G6P} + \text{H}$                                                     | 22%     | <1%     |
| R_pfk         | 4       | $\text{ATP} + \text{F6P} \rightarrow \text{ADP} + \text{FBP}$                                                                | 24%     | <1%     |
| R_pps         | 22      | $\text{ATP} + \text{H}_2\text{O} + \text{PYR} \rightarrow \text{AMP} + \text{PEP} + \text{P}_i$                              | 1%      | 1%      |
| R_acs         | 70      | $\text{AC} + \text{ATP} + \text{COA} \rightarrow \text{ACCOA} + \text{AMP} + \text{PP}_i$                                    | 8%      | 19%     |
| R_glnA        | 86      | $\text{GLU} + \text{ATP} + \text{NH}_3 \rightarrow \text{GLN} + \text{ADP} + \text{P}_i$                                     | 1%      | 2%      |
| R_atp_amp     | 152     | $\text{ATP} + \text{H}_2\text{O} \rightarrow \text{AMP} + \text{PP}_i$                                                       | 6%      | 13%     |
| R_udp_utp     | 160     | $\text{UDP} + \text{ATP} \rightarrow \text{UTP} + \text{ADP}$                                                                | 3%      | 6%      |
| R_cdp_ctp     | 161     | $\text{CDP} + \text{ATP} \rightarrow \text{CTP} + \text{ADP}$                                                                | 4%      | 8%      |
| R_gdp_gtp     | 162     | $\text{GDP} + \text{ATP} \rightarrow \text{GTP} + \text{ADP}$                                                                | 3%      | 4%      |
| R_atp_ump     | 163     | $\text{ATP} + \text{UMP} \rightarrow \text{ADP} + \text{UDP}$                                                                | 1%      | 3%      |
| R_atp_cmp     | 164     | $\text{ATP} + \text{CMP} \rightarrow \text{ADP} + \text{CDP}$                                                                | 2%      | 3%      |
| R_adk_atp     | 166     | $\text{AMP} + \text{ATP} \rightarrow 2 \text{ADP}$                                                                           | 18%     | 35%     |
| tRNA charging | 185-204 | $\text{AA} + \text{tRNA} + \text{ATP} + \text{H}_2\text{O} \rightarrow \text{AA}\cdot\text{tRNA} + \text{AMP} + \text{PP}_i$ | 2%      | 2%      |
| Other         |         |                                                                                                                              | 4%      | 4%      |

Table 3: Mean and standard deviation of Akaike information criterion (AIC), by measurement, for the ensemble and random ensemble.

| Measurement | $\mu_{\text{AIC}}^{\text{Ens}}$ | $\sigma_{\text{AIC}}^{\text{Ens}}$ | $\mu_{\text{AIC}}^{\text{Rand}}$ | $\sigma_{\text{AIC}}^{\text{Rand}}$ | $\mu_{\text{AIC}}^{\text{Rand}} - \mu_{\text{AIC}}^{\text{Ens}}$ |
|-------------|---------------------------------|------------------------------------|----------------------------------|-------------------------------------|------------------------------------------------------------------|
| GLC         | 65.4                            | 2.1                                | 103.9                            | 0.6                                 | 38.5                                                             |
| CAT         | -23.0                           | 10.5                               | -5.2                             | <0.1                                | 17.8                                                             |
| PYR         | 64.8                            | 10.3                               | 84.7                             | 0.7                                 | 19.9                                                             |
| LAC         | 70.7                            | 4.5                                | 88.9                             | <0.1                                | 18.2                                                             |
| AC          | 79.4                            | 6.0                                | 96                               | 2.1                                 | 16.6                                                             |
| SUCC        | 59.6                            | 3.4                                | 55.5                             | 4.1                                 | -4.1                                                             |
| MAL         | 60.8                            | 4.1                                | 71.6                             | 6.3                                 | 10.8                                                             |
| ATP         | 51.1                            | 3.3                                | 69.1                             | <0.1                                | 18.0                                                             |
| ADP         | 39.8                            | 3.7                                | 53.2                             | 4.7                                 | 13.4                                                             |
| AMP         | 32.9                            | 1.5                                | 75.1                             | 5.7                                 | 42.2                                                             |
| GTP         | 53.4                            | 1.6                                | 68.2                             | <0.1                                | 14.8                                                             |
| GDP         | 45.7                            | 2.9                                | 43.6                             | 9.5                                 | -2.1                                                             |
| GMP         | 46.5                            | 4.2                                | 46.1                             | 12.5                                | -0.4                                                             |
| CTP         | 44.9                            | 2.6                                | 58.5                             | <0.1                                | 13.7                                                             |
| CDP         | 38.8                            | 1.6                                | 50.7                             | 8.2                                 | 11.8                                                             |
| CMP         | 32.1                            | 4.0                                | 51.9                             | 9.1                                 | 19.8                                                             |
| UTP         | 55.6                            | 5.2                                | 53                               | <0.1                                | -2.7                                                             |
| UDP         | 28.2                            | 4.6                                | 51.9                             | 11.5                                | 23.6                                                             |
| UMP         | 35.3                            | 3.3                                | 72.3                             | 7.3                                 | 36.9                                                             |
| ALA         | 66.4                            | 4.4                                | 100.5                            | 1.1                                 | 34.1                                                             |
| ASN         | 53.7                            | 1.5                                | 67.6                             | 3.8                                 | 13.8                                                             |
| ASP         | 65.9                            | 2.5                                | 79.5                             | <0.1                                | 13.6                                                             |
| CYS         | 60.5                            | 3.1                                | 74                               | <0.1                                | 13.5                                                             |
| GLN         | 54.3                            | 5.6                                | 84.7                             | <0.1                                | 30.4                                                             |
| GLY         | 47.2                            | 12.7                               | 75.5                             | 11.7                                | 28.3                                                             |
| HIS         | 46.3                            | 6.2                                | 43.2                             | 3.2                                 | -3.2                                                             |
| ILE         | 53.3                            | 3.8                                | 48.4                             | 4.8                                 | -5.0                                                             |
| LEU         | 41.5                            | 6.5                                | 52.5                             | 4.6                                 | 10.9                                                             |
| LYS         | 68.4                            | 2.0                                | 73.9                             | 0.2                                 | 5.5                                                              |
| MET         | 55.9                            | 1.0                                | 57.4                             | 4                                   | 1.5                                                              |
| PHE         | 43.4                            | 5.9                                | 57.7                             | 8.3                                 | 14.3                                                             |
| PRO         | 54.4                            | 2.8                                | 47.9                             | 6.7                                 | -6.5                                                             |
| SER         | 65.9                            | 4.1                                | 81.4                             | <0.1                                | 15.6                                                             |
| THR         | 28.2                            | 5.5                                | 63.2                             | 14.9                                | 35.0                                                             |
| TRP         | 31.2                            | 5.7                                | 79.9                             | 1.4                                 | 48.6                                                             |
| TYR         | 39.3                            | 2.0                                | 36.7                             | 5.4                                 | -2.6                                                             |
| VAL         | 51.3                            | 3.1                                | 55.5                             | 4.6                                 | 4.1                                                              |

Table 4: Reference values for reaction rate maxima ( $V_{max}$ ) from BioNumbers.  $V_{max}$  values calculated from turnover numbers ( $k_{cat}$ ) from BioNumbers, and a characteristic enzyme concentration of 170 nM. Characteristic rate maximum for all other reactions calculated as geometric mean of calculated rate maxima.

| Enzyme                   | Reaction  | $k_{cat}$ ( $\text{min}^{-1}$ ) | $V_{max}$ (mM/h) | BNID#  |
|--------------------------|-----------|---------------------------------|------------------|--------|
| Serine dehydrase         | R_ser_deg | 10400                           | 104              | 101119 |
| Isocitrate dehydrogenase | R_icd     | 11900                           | 119              | 101152 |
| Lactate dehydrogenase    | R_ldh     | 5800                            | 58               | 101036 |
| Aspartate transaminase   | R_aspC    | 25800                           | 258              | 101108 |
|                          | R_tyr     |                                 |                  |        |
|                          | R_phe     |                                 |                  |        |
| Enolase                  | R_eno     | 13200                           | 132              | 101028 |
| Pyruvate kinase          | R_pyk     | 25000                           | 250              | 101029 |
|                          |           |                                 | 101030           |        |
| Malic enzyme             | R_maeA    | 35400                           | 354              | 101167 |
|                          | R_maeB    |                                 |                  |        |
| Phosphofructokinase      | R_pfk     | 554400                          | 5544             | 104955 |
| Malate dehydrogenase     | R_mdh     | 33000                           | 330              | 101163 |
| Citrate Synthase         | R_gltA    | 42000                           | 420              | 101149 |
| 6PG dehydrogenase        | R_zwf     | 3200                            | 32               | 101048 |
|                          | R_pgl     |                                 |                  |        |
|                          | R_gnd     |                                 |                  |        |
| Succinate dehydrogenase  | R_sdh     | 121                             | 1.21             | 101162 |
| Succinyl-coA synthetase  | R_sucCD   | 4700                            | 47               | 101158 |
| 3PGA dehydrogenase       | R_gpm     | 1100                            | 11               | 101135 |
| PEP carboxylase          | R_ppc     | 35400                           | 354              | 101139 |
| 3PGA kinase              | R_pgk     | 4300                            | 43               | 101016 |
| Characteristic $V_{max}$ |           |                                 | 110              |        |

Table 5: Reference values for transcription, translation, and mRNA degradation from literature. Transcription rate calculated from elongation rate, mRNA length, and promoter activity level. Translation rate calculated from elongation rate, protein length, and polysome amplification constant. mRNA degradation rate calculated from mRNA degradation time.

| Description                          | Parameter                                            | Value | Units           | Reference   |
|--------------------------------------|------------------------------------------------------|-------|-----------------|-------------|
| T7 RNA polymerase concentration      | $R_T$                                                | 1.0   | $\mu\text{M}$   |             |
| Ribosome concentration               | $R_X$                                                | 2     | $\mu\text{M}$   | [10]        |
| Transcription saturation coefficient | $K_T$                                                | 100   | nM              | estimated   |
| Translation saturation coefficient   | $K_X$                                                | 45    | $\mu\text{M}$   | estimated   |
| Transcription elongation rate        | $\dot{v}_T$                                          | 25    | nt/s            | [10]        |
| CAT mRNA length                      | $l_G$                                                | 660   | nt              | [48]        |
| Promoter activity level              | $u$                                                  | 0.9   |                 | estimated   |
| Transcription rate                   | $k_{cat}^T = \left(\frac{\dot{v}_T}{l_G}\right) u$   | 123   | $\text{h}^{-1}$ | calculated  |
| Translation elongation rate          | $\dot{v}_X$                                          | 1.5   | aa/s            | [10]        |
| CAT protein length                   | $l_P$                                                | 219   | aa              | [48]        |
| Polysome amplification constant      | $K_P$                                                | 10    |                 | estimated   |
| Translation rate                     | $k_{cat}^X = \left(\frac{\dot{v}_X}{l_P}\right) K_P$ | 247   | $\text{h}^{-1}$ | calculated  |
| mRNA degradation time                | $t_{1/2}$                                            | 8     | min             | BNID 106253 |
| mRNA degradation rate                | $k_{deg} = \frac{\ln(2)}{t_{1/2}}$                   | 5.2   | $\text{h}^{-1}$ | calculated  |
| ATP transcription coefficient        | $\text{ATP}_T$                                       | 176   |                 | calculated  |
| CTP transcription coefficient        | $\text{CTP}_T$                                       | 144   |                 | calculated  |
| GTP transcription coefficient        | $\text{GTP}_T$                                       | 151   |                 | calculated  |
| UTP transcription coefficient        | $\text{UTP}_T$                                       | 189   |                 | calculated  |
| ATP tRNA charging coefficient        | $\text{ATP}_X$                                       | 219   |                 | calculated  |
| GTP translation coefficient          | $\text{GTP}_X$                                       | 438   |                 | calculated  |

Table 6: Nomenclature

| <b>Symbol</b> | <b>Compound name</b>                                      |
|---------------|-----------------------------------------------------------|
| GLC           | alpha-D-Glucose                                           |
| G6P           | Glucose 6-phosphate                                       |
| F6P           | Fructose 6-phosphate                                      |
| FBP           | Fructose 1,6-diphosphate                                  |
| T3P           | Dihydroxyacetone phosphate                                |
| 13DPG         | 1,3-bis-Phosphoglycerate                                  |
| 3PG           | 3-Phosphoglycerate                                        |
| 2PG           | 2-Phosphoglycerate                                        |
| PEP           | Phosphoenolpyruvate                                       |
| PYR           | Pyruvate                                                  |
| LAC           | D-Lactate                                                 |
| 6PG           | 6-Phospho-D-glucono-1,5-lactone;<br>6-Phospho-D-gluconate |
| RU5P          | D-Ribulose 5-phosphate                                    |
| XU5P          | D-Xylulose 5-phosphate                                    |
| R5P           | Ribose 5-phosphate                                        |
| S7P           | sedo-Heptulose 7-phosphate                                |
| G3P           | Glyceraldehyde 3-phosphate                                |
| E4P           | Erythrose 4-phosphate                                     |
| 2DDG6P        | 2-Dehydro-3-deoxy-D-gluconate 6-phosphate                 |
| COA           | Coenzyme A                                                |
| ACCOA         | Acetyl coenzyme A                                         |
| AC            | Acetate                                                   |
| CIT           | Citrate                                                   |
| ICIT          | Isocitrate                                                |
| AKG           | alpha-Ketoglutarate                                       |

*Continued on next page*

659

---

| <b>Symbol</b> | <b>Compound name</b> |
|---------------|----------------------|
| SUCCOA        | Succinyl coenzyme A  |
| SUCC          | Succinate            |
| FUM           | Fumarate             |
| MAL           | Malate               |
| OAA           | Oxaloacetate         |
| FOR           | Formate              |
| PROP          | Propanoate           |
| ALA           | Alanine              |
| ARG           | Arginine             |
| ASP           | Aspartate            |
| ASN           | Asparagine           |
| CYS           | Cysteine             |
| GLU           | Glutamate            |
| GLN           | Glutamine            |
| GLY           | Glycine              |
| HIS           | Histidine            |
| ILE           | Isoleucine           |
| LEU           | Leucine              |
| LYS           | L-Lysine             |
| MET           | Methionine           |
| PHE           | Phenylalanine        |
| PRO           | Proline              |
| SER           | Serine               |
| THR           | Threonine            |
| TRP           | Tryptophan           |
| TYR           | Tyrosine             |

---

*Continued on next page*

---

| <b>Symbol</b> | <b>Compound name</b>              |
|---------------|-----------------------------------|
| VAL           | Valine                            |
| AA            | Amino acid                        |
| AA-tRNA       | Aminoacyl tRNA                    |
| ATP           | Adenosine triphosphate            |
| ADP           | Adenosine diphosphate             |
| AMP           | Adenosine monophosphate           |
| CTP           | Cytidine triphosphate             |
| CDP           | Cytidine diphosphate              |
| CMP           | Cytidine monophosphate            |
| GTP           | Guanosine triphosphate            |
| GDP           | Guanosine diphosphate             |
| GMP           | Guanosine monophosphate           |
| UTP           | Uridine triphosphate              |
| UDP           | Uridine diphosphate               |
| UMP           | Uridine monophosphate             |
| CAT           | Chloramphenicol acetyltransferase |

---

661

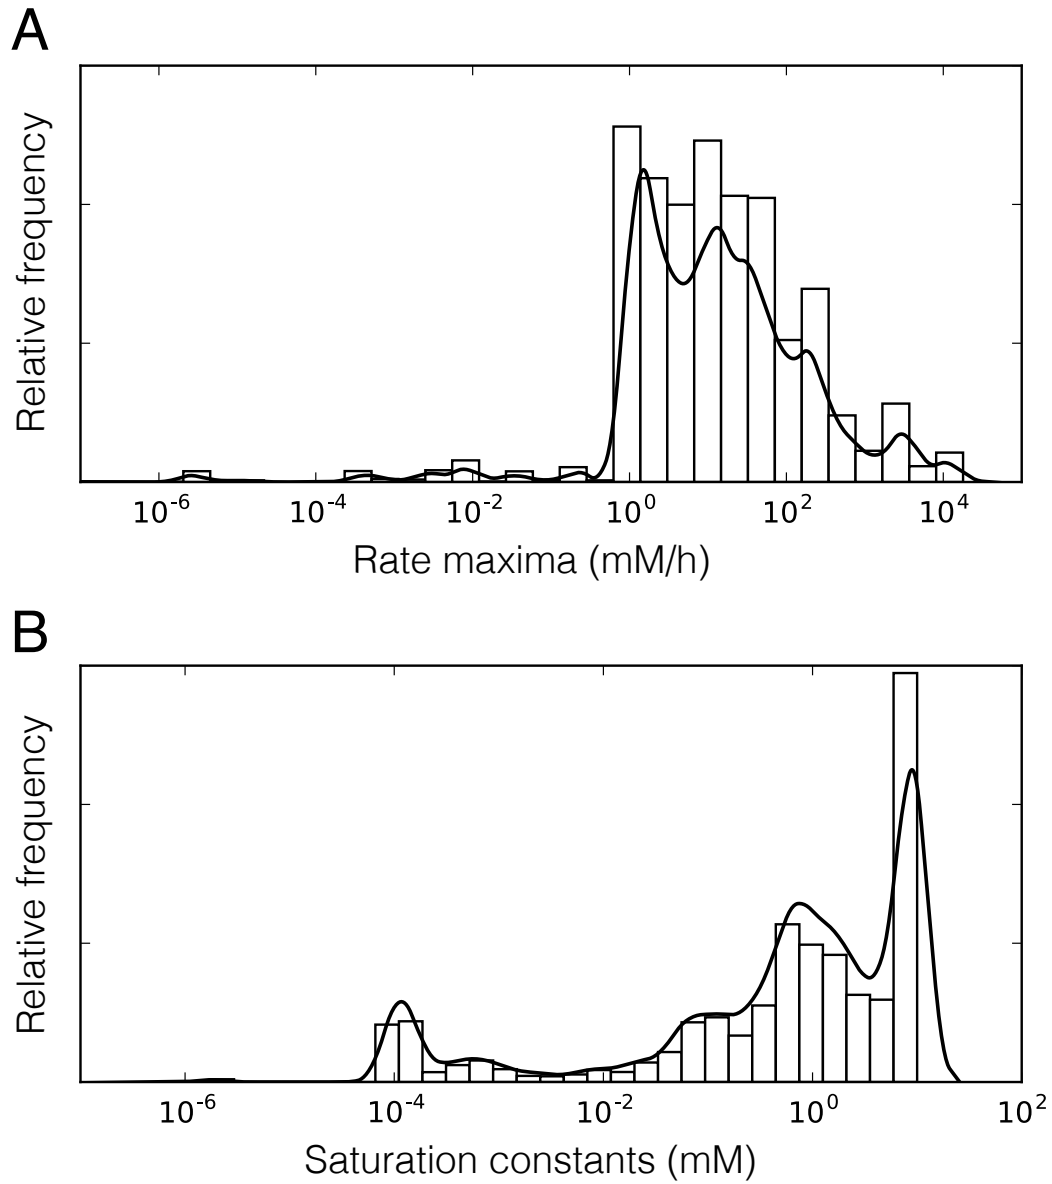

Figure S1: Histograms of model parameters, across the ensemble of 100 sets. A. Histogram of rate maxima. B. Histogram of saturation constants.
